# Supplementary material for: Exclusionary School Discipline and Black-White Disparities in Mortality through Early-Midlife
Source: Research Square preprint supplement (doi:10.21203/rs.3.rs-8079204/v1), 2025-12-03
Supplement: Supplementary file 1 [file 168a8691b42cd3462084469f.docx]

**APPENDIX Table 1:** ICD-10 Codes for Cause of Death Groupings

| **Underlying Cause** | **ICD-10 Code** |  |
| --- | --- | --- |
| *Internal Causes* |  |  |
| Infectious diseases | A00-B24, U07.1 |  |
| Cancers | C00-C96 |  |
| Circulatory and metabolic diseases | E00-E89, I00-I99 |  |
| All other internal | F00-H99, J00-R99 |  |
| *External causes* |  |  |
| Transport accidents | V01-V89.2 |  |
| Accidental poisoning and suicide | X40-X49, X60-X74 |  |
| Homicide | X85-Y09 |  |
| All other external | W00-X39, X50-Y98 |  |
